# Supplementary material for: Anti-Melanogenic Effects of Takifugu flavidus Muscle Hydrolysate in B16F10 Melanoma Cells and Zebrafish
Source: MDPI journal article supplement (doi:10.3390/md22050206), 2024-04-29
Supplement: s1 [file s1]

**Table S1.** Molecular weight distribution of TFMH.

| Molecular weight range (kDa) | Proportion of components (%) |
|------------------------------|------------------------------|
| >5                           | 0.01                         |
| 1-5                          | 2.68                         |
| 0-1                          | 97.31                        |

**Table S2.** Effects of TFMH on zebrafish growth.

|         | TFMH Concentration (mg/mL) | Death rate (%) |
|---------|----------------------------|----------------|
| Control | 0                          | 100%           |
| PTU     | 200                        | 100%           |
|         | 50                         | 98.2%          |
|         | 100                        | 99.0%          |
| TFMH    | 200                        | 95.6%          |
|         | 400                        | 85.6%          |

**Table S3.** Effects of T-6 (FGFRSP) on zebrafish growth.

|         | T-6 Concentration (μmol/L) | Death rate (%) |
|---------|----------------------------|----------------|
| Control | 0                          | 100%           |
| PTU     | 200                        | 100%           |
|         | 25                         | 100%           |
|         | 50                         | 100%           |
|         | 100                        | 100%           |
| T-6     | 200                        | 95.6%          |
|         | 500                        | 58.7%          |



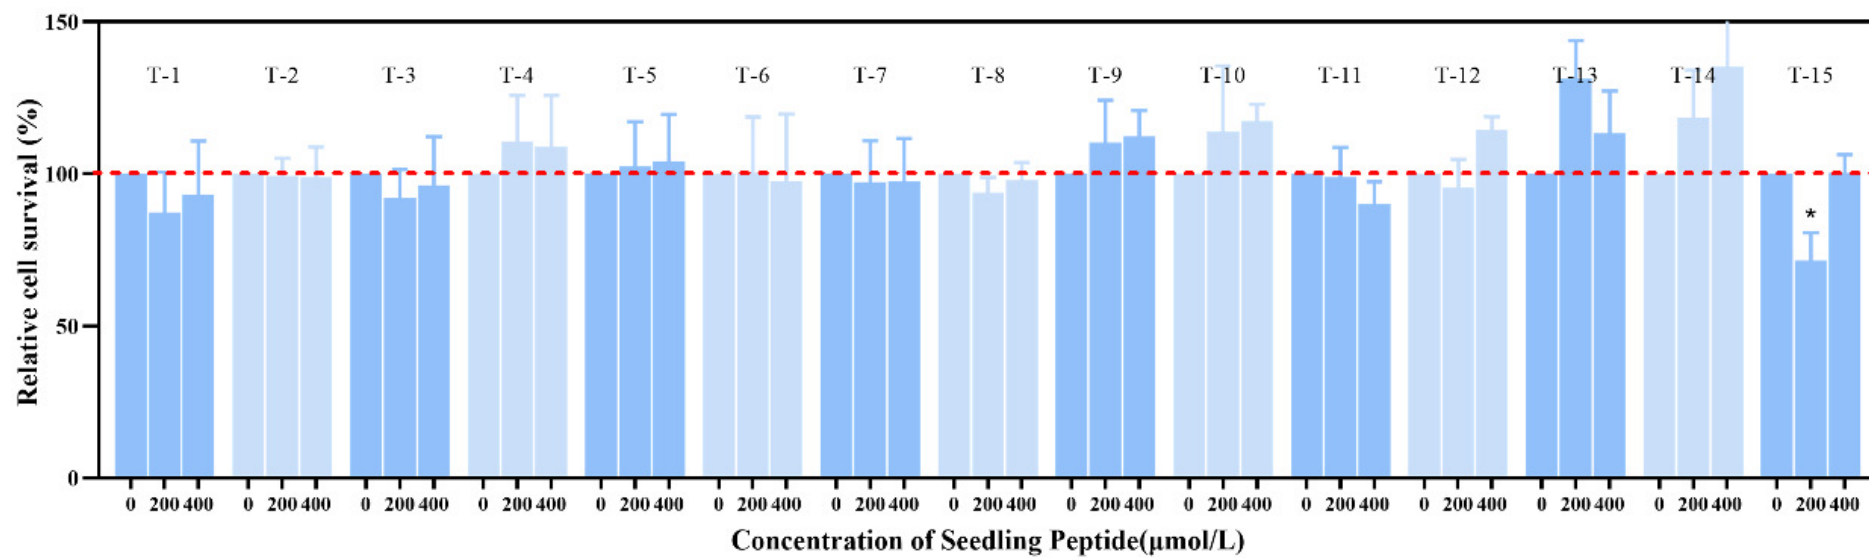

**Figure S1.** Effect of 15 candidate peptides on the viability of B16F10 cells.
